# Supplementary material for: High metabolic variation for seaweeds in response to environmental changes: a case study of the brown algae Lobophora in coral reefs
Source: Sci Rep. 2019 Jan 30;9:993. doi: 10.1038/s41598-018-38177-z (PMC6353962; doi:10.1038/s41598-018-38177-z)
Supplement: Supplementary file 1 — supplementary information [file 41598_2018_38177_MOESM1_ESM.pdf]

## SUPPLEMENTARY INFORMATION

### **High metabolomic variation for seaweeds in response to environmental changes: a case study of the brown algae *Lobophora* in coral reefs**

Julie GAUBERT<sup>1,2\*</sup>, Claude E. PAYRI<sup>2</sup>, Christophe VIEIRA<sup>3</sup>, Hiren SOLANKI<sup>4</sup>, Olivier P. THOMAS<sup>4</sup>

<sup>1</sup> Sorbonne Universités, Collège Doctoral, F-75005 Paris, France.

<sup>2</sup> UMR ENTROPIE (IRD, UR, CNRS), Institut de Recherche pour le Développement, B.P. A5, 98848 Nouméa Cedex, Nouvelle-Calédonie.

<sup>3</sup> Phycology Research Group and Center for Molecular Phylogenetics and Evolution, Gent University, Krijgslaan 281 (S8), 9000, Ghent, Belgium

<sup>4</sup> Marine Biodiscovery, School of Chemistry and Ryan Institute, National University of Ireland Galway (NUI Galway), University Road, H91 TK33 Galway, Ireland.

\*corresponding authors: [julieg1907@gmail.com](mailto:julieg1907@gmail.com)

## FIGURES

**Figure S1.** Hierarchical Clustering Analysis dendrogram of *Lobophora* species metabolome from different sites in the South-West lagoon of Nouméa, analyzed in LC-MS(qTOF) positive mode (distance measure: Euclidean, clustering algorithm: Ward). Cluster A: *Lobophora rosacea*, B: *Lobophora sonderii* and C: *Lobophora obscura*.

**Figure S2.** Example of chromatogram obtained by LC-MS showing the two main compounds annotated as polyolefins ( $m/z$  304.3026  $[M+NH_4]^+$ ,  $C_{21}H_{34}$  and  $m/z$  332.3332  $[M+NH_4]^+$ ,  $C_{23}H_{38}$ ).

**Figure S3.** Example of in-house  $^1H$ -NMR spectra (500 Mz) obtained on a fraction of *Lobophora sonderii*.

**Figure S4.** Box plots of the chemomarkers annotated in *Lobophora* responsible for metabolomic differences according to sites (following Fig. 4). Ion intensities of chemomarkers are expressed as mean normalized intensities  $\pm$  SD (log-transformed data). For (a) *Lobophora rosacea* :  $n=6$  for Banc Nord (BN), Canard (Can) and Ricaudy (Ric),  $n=5$  for Larégnère (Lar) and  $n=4$  for Crouy (Cro). Statistical analyses were performed using Kruskal-Wallis (KW) followed by post-hoc Conover's test. Letters indicate distinct groups based on post-hoc pairwise comparisons among sites for each chemomarker ( $p < 0.05$ ). For (b) *Lobophora sonderii*:  $n=6$  and differences between ion intensities at Crouy vs Ricaudy were tested with Mann-Whitney tests (\*:  $p < 0.01$ ).

**Figure S5.** PCA score plots of methanolic fractions of *Lobophora rosacea* (LR), *Lobophora obscura* (LO), *Lobophora monticola* (LM) and *Lobophora sonderii* (LS) according to months.

**Figure S6.** Map of the collected sites in the South-West lagoon of Nouméa, New-Caledonia (blue stars: sites used for the temporal study, red stars: sites collected for the spatial study).

**Figure S7.** Experimental scheme of the cross-transplantations: the case of *Lobophora sonderii*. (a) *Lobophora sonderii* in its natural habitat or (b-c) in new habitats. (b) Living coral colony with fronds of *Lobophora sonderii* fixed with tulle strips and (c) PVC slab holding 18 dead coral fragments where *Lobophora sonderii* will be attached with tulle strips (Pictures from J. Gaubert).

## TABLES

**Table S1.** Results of the permutational pairwise test for metabotype differentiation according to months in *Lobophora rosacea* (999 permutations, P value adjustment method: fdr). No statistically significant results are in bold ( $p > 0.05$ )

**Table S2.** Results of the permutational pairwise test for metabotype differentiation according to months in *Lobophora monticola* (999 permutations, P value adjustment method: fdr). No statistically significant results are in bold ( $p > 0.05$ )

**Table S3.** Results of the permutational pairwise test for metabotype differentiation according to months in *Lobophora sonderii* (999 permutations, P value adjustment method: fdr). No statistically significant results are in bold ( $p > 0.05$ )

**Table S4.** Results of the permutational pairwise test for metabotype differentiation according to months in *Lobophora obscura* (999 permutations, P value adjustment method: fdr). No statistically significant results are in bold ( $p > 0.05$ )

**Table S5.** Post-hoc permutational pairwise test based on crossed model validation for *Lobophora rosacea* metabotype differentiation according to sites (999 permutations, p-value adjustment method: fdr). Significant p-values ( $p < 0.05$ ) are in bold.

**Table S6a.** Characterization of the type of habitat for *Lobophora rosacea* and *Lobophora obscura*.

**Table S6b.** Characterization of the type of habitat for *Lobophora sonderii*.

**Table S7.** Post-hoc permutational pairwise test based on crossed model validation for *Lobophora sonderii* metabotypes differentiation according to the time of transplantation (999 permutations, p-value adjustment method: fdr). Significant p-values ( $p < 0.05$ ) are in bold.

**Table S8.** Post-hoc permutational pairwise test based on crossed model validation for *Lobophora sonderii* and *Lobophora obscura* metabotypes differentiation according to the habitat: seaweed bed, leaving coral or dead coral (999 permutations, p-value adjustment method: fdr). Significant p-values ( $p < 0.05$ ) are in bold.

**Table S9.** Ions responsible for the difference according to the habitat in *Lobophora sonderii* during the 14 days cross-transplantations. The score MFG (molecular formulas generation) is the MFG overall match score (0-100 %) combining the MS and MS/MS scores. For each ion M= molecular weight, T= retention time.

**Table S10.** Sampling of *Lobophora* species for the study of metabolomic variations according to space, time and after the transplantation experiments.

**Table S11.** Monthly means of Sea Surface Temperature (SST, °C), photoperiod (hours.day<sup>-1</sup>), Photosynthetic Active Radiation (PAR, mol.m<sup>-2</sup>.day<sup>-1</sup>), global radiation (Joules.cm<sup>-2</sup>), rainfall (mm. day<sup>-1</sup>) and salinity (psu) recorded from December 2015 to December 2016 in the South-West lagoon of Nouméa, New-Caledonia.

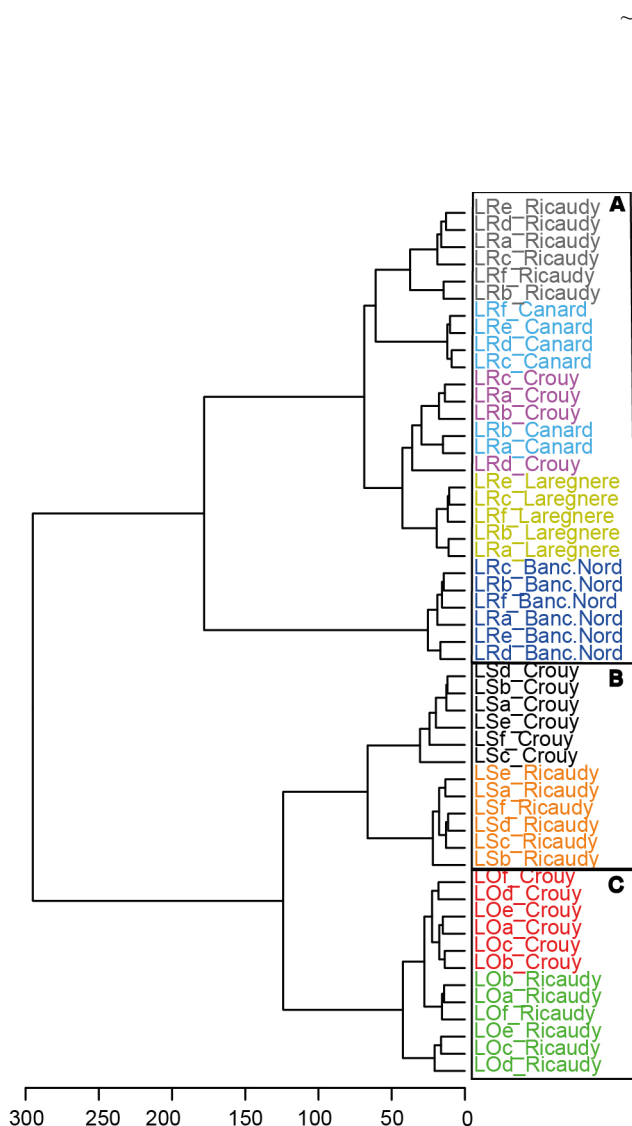

**Figure S1.** Hierarchical Clustering Analysis dendrogram of *Lobophora* species metabolome from different sites in the South-West lagoon of Nouméa, analyzed in LC-MS(qTOF) positive mode (distance measure: Euclidean, clustering algorithm: Ward). Cluster A: *Lobophora rosacea*, B: *Lobophora sonderii* and C: *Lobophora obscura*.

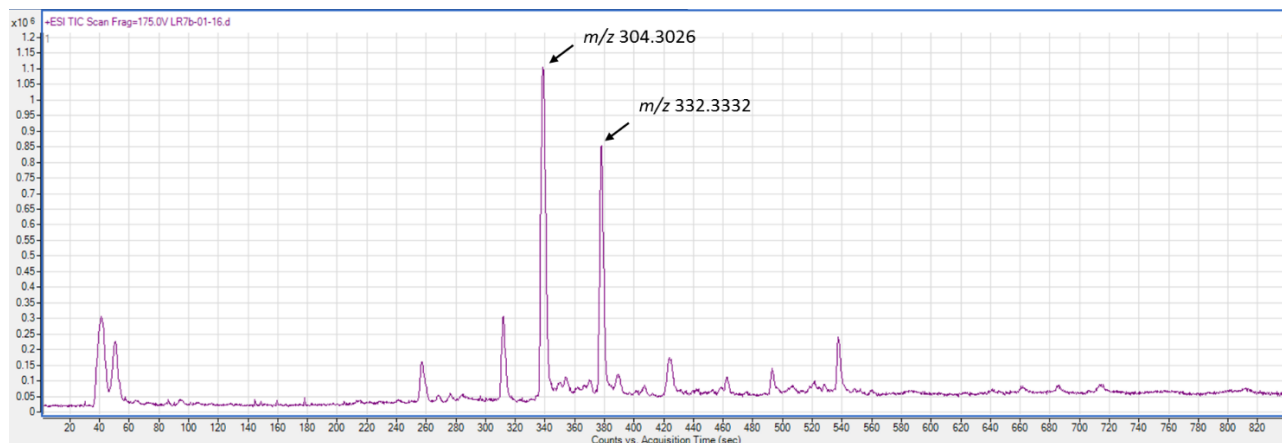

**Figure S2.** Example of chromatogram obtained by LC-MS showing the two main compounds annotated as polyolefins ( $m/z$  304.3026  $[M+NH_4]^+$ ,  $C_{21}H_{34}$  and  $m/z$  332.3332  $[M+NH_4]^+$ ,  $C_{23}H_{38}$ ).

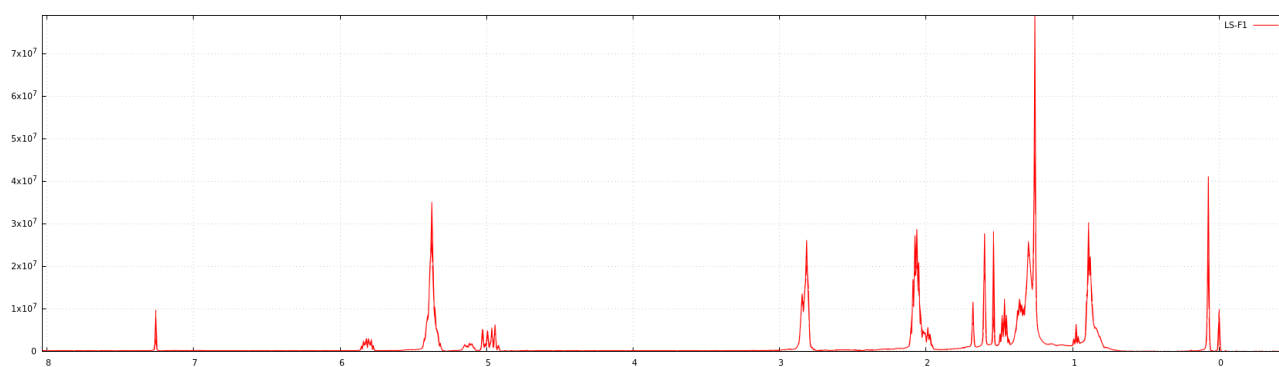

**Figure S3.** Example of in-house <sup>1</sup>H-NMR spectra (500 Mz) obtained on a fraction of *Lobophora sonderii*.

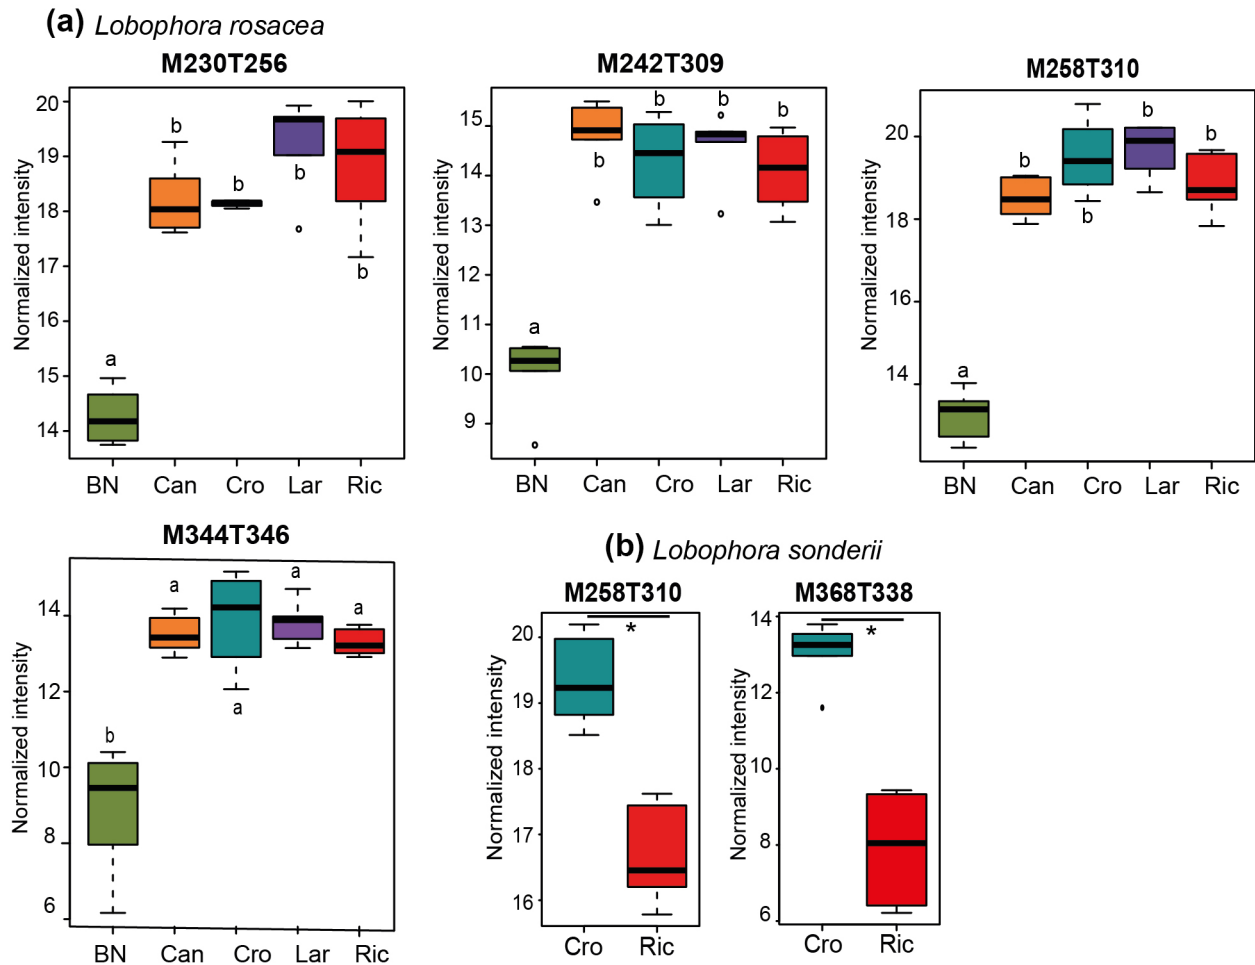

**Figure S4.** Box plots of the chemomarkers annotated in *Lobophora* responsible for metabolomic differences according to sites (following Fig. 4). Ion intensities of chemomarkers are expressed as mean normalized intensities  $\pm$  SD (log-transformed data). For (a) *Lobophora rosacea* :  $n = 6$  for Banc Nord (BN), Canard (Can) and Ricaudy (Ric),  $n = 5$  for Larégnère (Lar) and  $n = 4$  for Crouy (Cro). Statistical analyses were performed using Kruskal-Wallis (KW) followed by post-hoc Conover's test. Letters indicate distinct groups based on post-hoc pairwise comparisons among sites for each chemomarker ( $p < 0.05$ ). For (b) *Lobophora sonderii*:  $n = 6$  and differences between ion intensities at Crouy vs Ricaudy were tested with Mann-Whitney tests (\*:  $p < 0.01$ ).

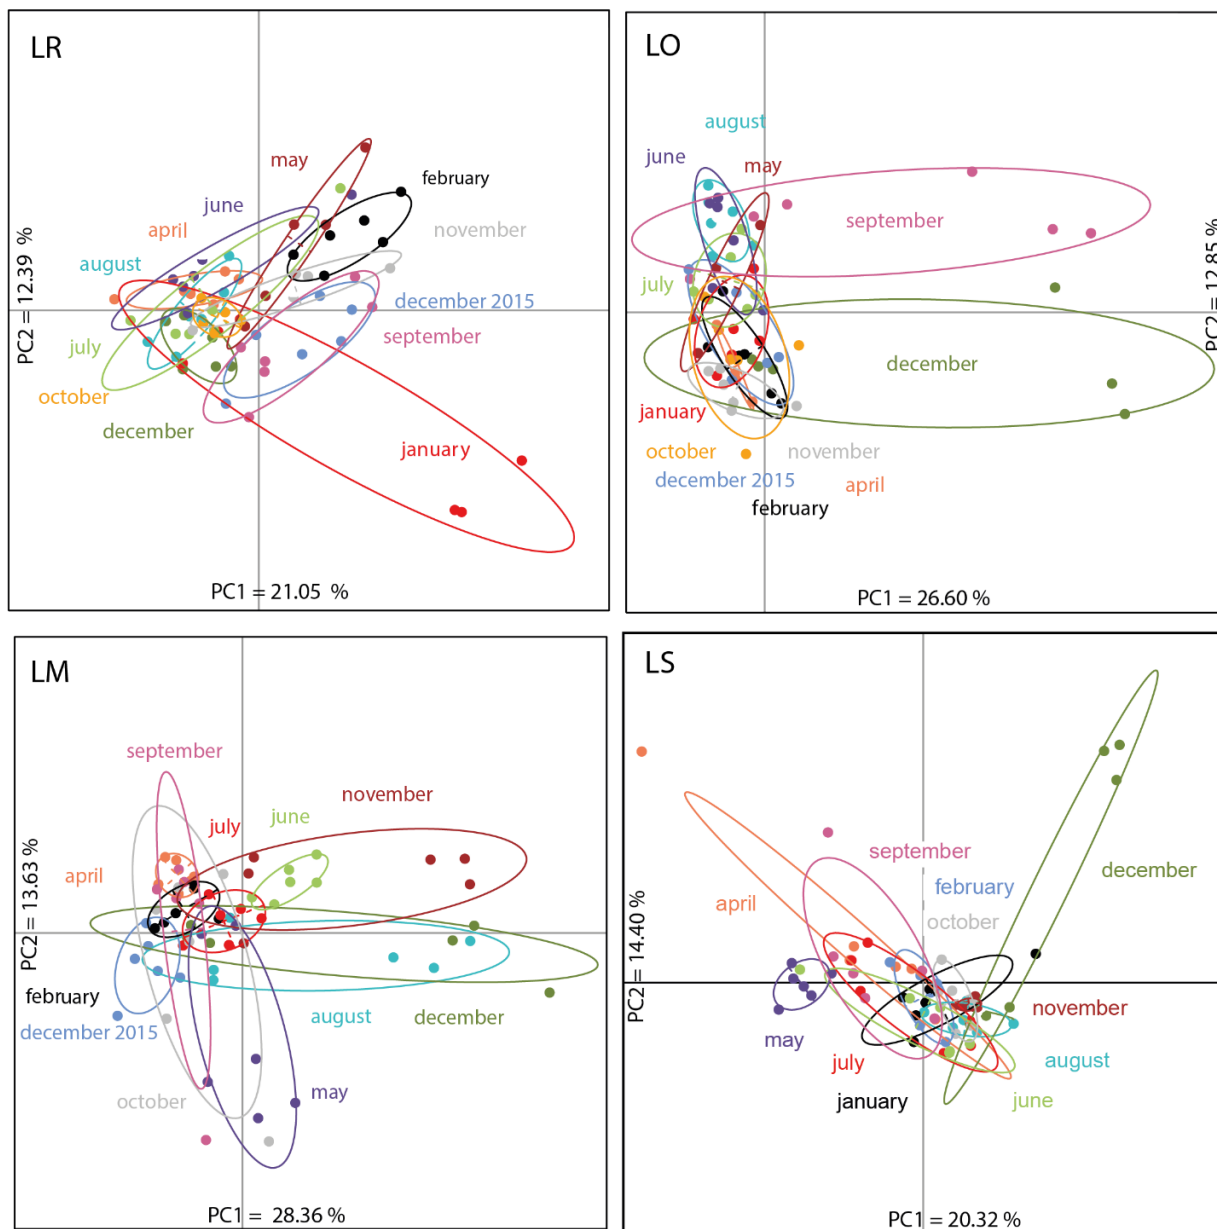

**Figure S5.** PCA score plots of methanolic fractions of *Lobophora rosacea* (LR), *Lobophora obscura* (LO), *Lobophora monticola* (LM) and *Lobophora sonderii* (LS) according to months.

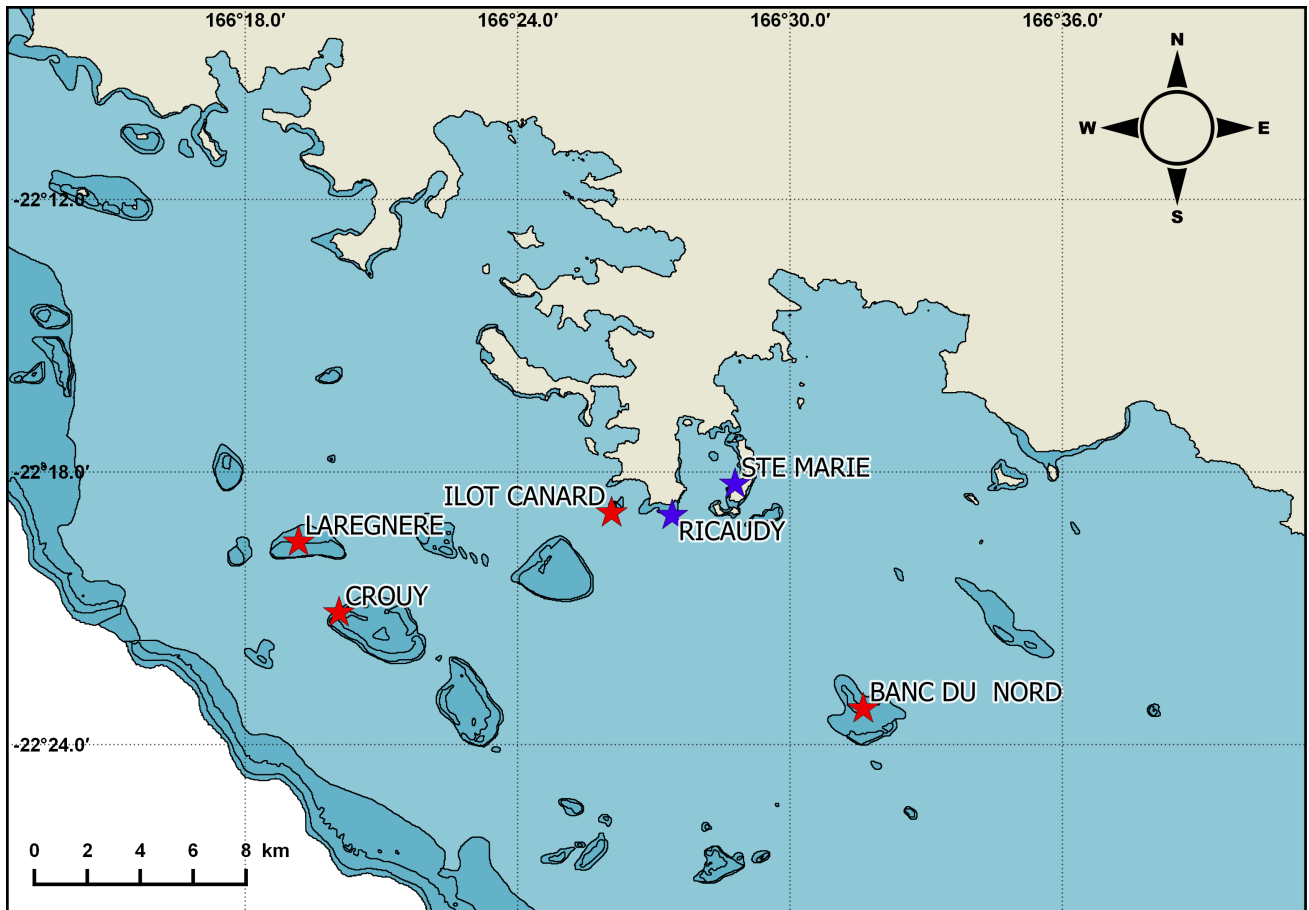

**Figure S6.** Map of the collected sites in the South-West lagoon of Nouméa, New-Caledonia (blue stars: sites used for the temporal study, red stars: sites collected for the spatial study).

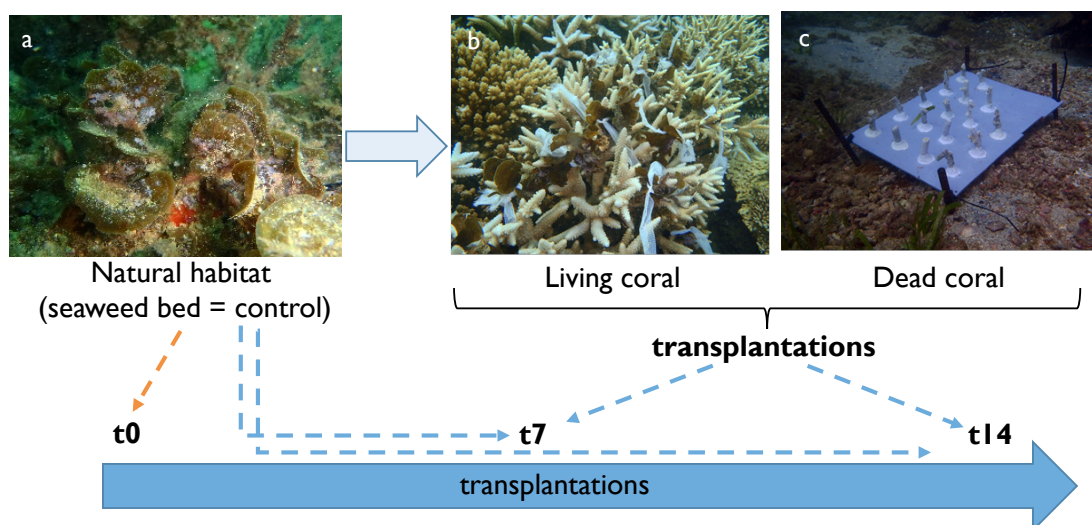

**Figure S7.** Experimental scheme of the cross-transplantations: the case of *Lobophora sonderii*. (a) *Lobophora sonderii* in its natural habitat or (b-c) in new habitats. (b) Living coral colony with fronds of *Lobophora sonderii* fixed with tulle strips and (c) PVC slab holding 18 dead coral fragments where *Lobophora sonderii* will be attached with tulle strips (Pictures from J. Gaubert).

**Table S1.** Results of the permutational pairwise test for metabotype differentiation according to months in *Lobophora rosacea* (999 permutations, P value adjustment method: fdr). No statistically significant results are in bold ( $p > 0.05$ ).

|           | april  | august | december | dec_2015 | february | january | july          | june   | may    | November | october |
|-----------|--------|--------|----------|----------|----------|---------|---------------|--------|--------|----------|---------|
| august    | 0.0078 | -      | -        | -        | -        | -       | -             | -      | -      | -        | -       |
| december  | 0.0087 | 0.0078 | -        | -        | -        | -       | -             | -      | -      | -        | -       |
| dec_2015  | 0.0078 | 0.0078 | 0.0090   | -        | -        | -       | -             | -      | -      | -        | -       |
| february  | 0.0078 | 0.0078 | 0.0078   | 0.0087   | -        | -       | -             | -      | -      | -        | -       |
| january   | 0.0078 | 0.0078 | 0.0078   | 0.0159   | 0.0078   | -       | -             | -      | -      | -        | -       |
| july      | 0.0230 | 0.0090 | 0.0078   | 0.0153   | 0.0184   | 0.0090  | -             | -      | -      | -        | -       |
| june      | 0.0179 | 0.0078 | 0.0078   | 0.0078   | 0.0142   | 0.0078  | 0.0454        | -      | -      | -        | -       |
| may       | 0.0078 | 0.0087 | 0.0078   | 0.0078   | 0.0078   | 0.0078  | 0.0184        | 0.0142 | -      | -        | -       |
| november  | 0.0078 | 0.0144 | 0.0144   | 0.0078   | 0.0078   | 0.0078  | <b>0.0850</b> | 0.0094 | 0.0094 | -        | -       |
| october   | 0.0090 | 0.0078 | 0.0078   | 0.0159   | 0.0078   | 0.0094  | 0.0192        | 0.0144 | 0.0087 | 0.0467   | -       |
| september | 0.0078 | 0.0078 | 0.0078   | 0.0094   | 0.0078   | 0.0094  | 0.0144        | 0.0078 | 0.0078 | 0.0090   | 0.0090  |

**Table S2.** Results of the permutational pairwise test for metabotype differentiation according to months in *Lobophora monticola* (999 permutations, P value adjustment method: fdr). No statistically significant results are in bold ( $p > 0.05$ ).

|               | april  | august        | december | december_2015 | february | july          | june   | may    | november | october |
|---------------|--------|---------------|----------|---------------|----------|---------------|--------|--------|----------|---------|
| august        | 0.0086 | -             | -        | -             | -        | -             | -      | -      | -        | -       |
| december      | 0.0086 | 0.0094        | -        | -             | -        | -             | -      | -      | -        | -       |
| december_2015 | 0.0094 | 0.0131        | 0.0086   | -             | -        | -             | -      | -      | -        | -       |
| february      | 0.0086 | 0.0094        | 0.0086   | 0.0086        | -        | -             | -      | -      | -        | -       |
| july          | 0.0086 | 0.0137        | 0.0086   | 0.0162        | 0.0086   | -             | -      | -      | -        | -       |
| june          | 0.0086 | 0.0254        | 0.0138   | 0.0124        | 0.0086   | <b>0.1190</b> | -      | -      | -        | -       |
| may           | 0.0122 | 0.0137        | 0.0086   | 0.0086        | 0.0086   | 0.0086        | 0.0131 | -      | -        | -       |
| november      | 0.0086 | 0.0124        | 0.0086   | 0.0157        | 0.0086   | 0.0124        | 0.0162 | 0.0086 | -        | -       |
| october       | 0.0086 | 0.0138        | 0.0086   | 0.0086        | 0.0086   | 0.0086        | 0.0138 | 0.0086 | 0.0124   | -       |
| september     | 0.0086 | <b>0.1190</b> | 0.0086   | 0.0086        | 0.0086   | 0.0405        | 0.0138 | 0.0086 | 0.0086   | 0.0086  |

**Table S3.** Results of the permutational pairwise test for metabotype differentiation according to months in *Lobophora sonderii* (999 permutations, P value adjustment method: fdr). No statistically significant results are in bold ( $p > 0.05$ ).

|           | april  | august        | december | february | january | july          | june   | may    | november | october |
|-----------|--------|---------------|----------|----------|---------|---------------|--------|--------|----------|---------|
| august    | 0.0183 | -             | -        | -        | -       | -             | -      | -      | -        | -       |
| december  | 0.0092 | 0.0148        | -        | -        | -       | -             | -      | -      | -        | -       |
| february  | 0.0183 | 0.0092        | 0.0092   | -        | -       | -             | -      | -      | -        | -       |
| january   | 0.0092 | 0.0092        | 0.0187   | 0.0097   | -       | -             | -      | -      | -        | -       |
| july      | 0.0092 | 0.0092        | 0.0092   | 0.0092   | 0.0092  | -             | -      | -      | -        | -       |
| june      | 0.0092 | 0.0148        | 0.0137   | 0.0171   | 0.0166  | <b>0.1240</b> | -      | -      | -        | -       |
| may       | 0.0092 | 0.0092        | 0.0092   | 0.0092   | 0.0092  | 0.0097        | 0.0201 | -      | -        | -       |
| november  | 0.0137 | <b>0.0652</b> | 0.0092   | 0.0092   | 0.0187  | 0.0092        | 0.0145 | 0.0092 | -        | -       |
| october   | 0.0092 | 0.0145        | 0.0092   | 0.0097   | 0.0157  | 0.0097        | 0.0092 | 0.0092 | 0.0092   | -       |
| september | 0.0218 | 0.0092        | 0.0092   | 0.0092   | 0.0092  | 0.0148        | 0.0194 | 0.0092 | 0.0183   | 0.0171  |

**Table S4.** Results of the permutational pairwise test for metabotype differentiation according to months in *Lobophora obscura* (999 permutations, P value adjustment method: fdr). No statistically significant results are in bold ( $p > 0.05$ ).

|               | april        | august       | december | decem_2015   | february     | january      | july         | june         | may          | november | october |
|---------------|--------------|--------------|----------|--------------|--------------|--------------|--------------|--------------|--------------|----------|---------|
| august        | 0.016        | -            | -        | -            | -            | -            | -            | -            | -            | -        | -       |
| december      | 0.016        | 0.011        | -        | -            | -            | -            | -            | -            | -            | -        | -       |
| december_2015 | 0.026        | 0.011        | 0.011    | -            | -            | -            | -            | -            | -            | -        | -       |
| february      | <b>0.318</b> | 0.018        | 0.011    | 0.032        | -            | -            | -            | -            | -            | -        | -       |
| january       | 0.041        | 0.011        | 0.018    | <b>0.182</b> | <b>0.443</b> | -            | -            | -            | -            | -        | -       |
| july          | 0.018        | 0.020        | 0.016    | <b>0.076</b> | 0.021        | <b>0.136</b> | -            | -            | -            | -        | -       |
| june          | 0.025        | 0.022        | 0.018    | 0.021        | 0.018        | <b>0.059</b> | <b>0.063</b> | -            | -            | -        | -       |
| may           | <b>0.071</b> | <b>0.223</b> | 0.033    | <b>0.093</b> | <b>0.094</b> | <b>0.434</b> | <b>0.441</b> | <b>0.690</b> | -            | -        | -       |
| november      | 0.011        | 0.011        | 0.011    | 0.011        | 0.016        | 0.021        | 0.018        | 0.020        | <b>0.224</b> | -        | -       |
| october       | 0.011        | 0.021        | 0.018    | 0.011        | 0.020        | 0.042        | 0.020        | 0.076        | <b>0.442</b> | 0.022    | -       |

**Table S5.** Post-hoc permutational pairwise test based on crossed model validation for *Lobophora rosacea* metabotype differentiation according to sites (999 permutations, p-value adjustment method: fdr). Significant p-values ( $p < 0.05$ ) are in bold.

|           | Banc Nord     | Canard        | Crouy         | Larégnère    |
|-----------|---------------|---------------|---------------|--------------|
| Canard    | <b>0.0043</b> | -             | -             | -            |
| Crouy     | <b>0.0133</b> | <b>0.0043</b> | -             | -            |
| Larégnère | <b>0.004</b>  | <b>0.004</b>  | <b>0.014</b>  | -            |
| Ricaudy   | <b>0.004</b>  | <b>0.004</b>  | <b>0.0112</b> | <b>0.004</b> |

**Table S6a.** Characterization of the type of habitat for *Lobophora rosacea* and *Lobophora obscura*.

| Sites             | Ricaudy                                                                                    | Crouy                                                                                                             | Larégnère                                                        | Banc Nord                                                          | Canard islet                                                       |
|-------------------|--------------------------------------------------------------------------------------------|-------------------------------------------------------------------------------------------------------------------|------------------------------------------------------------------|--------------------------------------------------------------------|--------------------------------------------------------------------|
| Type of reef      | Fringing reef                                                                              | Intermediate reef                                                                                                 | Islet reef                                                       | Bank                                                               | Islet reef                                                         |
| geomorphology     | Reef flat                                                                                  | Reef flat                                                                                                         | Reef flat                                                        | Intertidal patch reef flat                                         | Shallow upper reef slope                                           |
| substrate         | Rock, debris, dead corals, Corallinaceae                                                   | Rock, slab                                                                                                        | Rock, sand and dead corals                                       | Rock, sand                                                         | Rock, debris of dead corals, sand                                  |
| Benthic dominance | Coral assembly dominated by fingers forms of <i>Acropora spp</i> and <i>Montipora spp.</i> | Coral assembly dominated by <i>Acropora spp</i> (fingers and plates forms) and soft corals <i>Sarcophyton spp</i> | Coral assembly dominated by fingers forms of <i>Acropora spp</i> | Coral assembly dominated by branching forms of <i>Acropora spp</i> | Coral assembly dominated by branching forms of <i>Acropora spp</i> |
| Rugosity          | Weak                                                                                       | Medium                                                                                                            | Medium                                                           | Strong                                                             | Medium                                                             |
| depth             | 3.8 m                                                                                      | 1.9 m                                                                                                             | 1.5 m                                                            | 5.8 m                                                              | 4.8 m                                                              |

**Table S6b.** Characterization of the type of habitat for *Lobophora sonderii*.

| Sites             | Ricaudy                                       | Crouy                                         |
|-------------------|-----------------------------------------------|-----------------------------------------------|
| Type of reef      | Fringing reef                                 | Intermediate reef                             |
| Geomorphology     | Terrasse                                      | Terrasse                                      |
| Substrate         | Slab, sand, debris                            | Slab, sand, debris                            |
| Benthic dominance | Macroalgae dominated by <i>Sargassum spp.</i> | Macroalgae dominated by <i>Sargassum spp.</i> |
| Rugosity          | Weak                                          | Weak                                          |
| depth             | 4.6 m                                         | 1.9 m                                         |

**Table S7.** Post-hoc permutational pairwise test based on crossed model validation for *Lobophora sonderii* metabotypes differentiation according to the time of transplantation (999 permutations, p-value adjustment method: fdr). Significant p-values ( $p < 0.05$ ) are in bold.

| <i>Lobophora sonderii</i> |              |              |              |
|---------------------------|--------------|--------------|--------------|
|                           | t0           | t14          | t14bis       |
| t14                       | <b>0.014</b> | -            | -            |
| t14bis                    | <b>0.013</b> | <b>0.003</b> | -            |
| t7                        | <b>0.003</b> | <b>0.003</b> | <b>0.003</b> |

**Table S8.** Post-hoc permutational pairwise test based on crossed model validation for *Lobophora sonderii* and *Lobophora obscura* metabotypes differentiation according to the habitat: seaweed bed, leaving coral or dead coral (999 permutations, p-value adjustment method: fdr). Significant p-values ( $p < 0.05$ ) are in bold.

| <i>Lobophora obscura</i> |              |               | <i>Lobophora sonderii</i> |               |               |
|--------------------------|--------------|---------------|---------------------------|---------------|---------------|
|                          | seaweed bed  | leaving coral |                           | seaweed bed   | leaving coral |
| leaving coral            | <b>0.044</b> | -             | leaving coral             | <b>0.0015</b> | -             |
| dead coral               | <b>0.021</b> | <b>0.003</b>  | dead coral                | <b>0.0015</b> | <b>0.0200</b> |

**Table S9.** Ions responsible for the difference according to the habitat in *Lobophora sonderii* during the 14 days cross-transplantations. The score MFG (molecular formulas generation) is the MFG overall match score (0-100 %) combining the MS and MS/MS scores. For each ion M= molecular weight, T= retention time.

| Ion      | Ion $m/z$ | RT (s) | Ion          | molecular formula | Diff. ppm | Score MFG |
|----------|-----------|--------|--------------|-------------------|-----------|-----------|
| M200T289 | 200.2363  | 289    | $[M+NH_4]^+$ | $C_{13}H_{26}$    | 5.88      | 89.54     |
| M214T302 | 214.2520  | 302    | $[M+NH_4]^+$ | $C_{14}H_{28}$    | 5.13      | 93.79     |
| M228T363 | 228.2669  | 363    | $[M+NH_4]^+$ | $C_{15}H_{30}$    | 7.94      | 75.8      |
| M242T377 | 242.2822  | 377    | $[M+NH_4]^+$ | $C_{16}H_{32}$    | 8.47      | 73.36     |
| M304T379 | 304.3006  | 379    | $[M+NH_4]^+$ | $C_{21}H_{34}$    | -2.31     | 93.08     |
| M332T437 | 332.3328  | 437    | $[M+NH_4]^+$ | $C_{23}H_{38}$    | -20.37    | 63.35     |

**Table S10.** Sampling of *Lobophora* species for the study of metabolomic variations according to space, time and after the transplantation experiments.

| Study / species  |                         | <i>L. rosacea</i> | <i>L. sonderii</i> | <i>L. obscura</i> | <i>L. monticola</i> |
|------------------|-------------------------|-------------------|--------------------|-------------------|---------------------|
| spatial          | Larégnère               | 5                 | -                  | -                 | -                   |
|                  | Crouy                   | 4                 | 6                  | 6                 | -                   |
|                  | Canard                  | 6                 | -                  | -                 | -                   |
|                  | Banc Nord               | 6                 | -                  | -                 | -                   |
|                  | Ricaudy                 | 6                 | 6                  | 6                 | -                   |
| temporal         | 13 months of collection | 69                | 66                 | 67                | 66                  |
| transplantations | summer                  | -                 | 42                 | 38                | -                   |
| TOTAL of samples |                         |                   |                    |                   | 399                 |

**Table S11.** Monthly means of Sea Surface Temperature (SST, °C), photoperiod (hours. day<sup>-1</sup>), Photosynthetic Active Radiation (PAR, mol.m<sup>-2</sup>.day<sup>-1</sup>), global radiation (Joules.cm<sup>-2</sup>), rainfall (mm. day<sup>-1</sup>) and salinity (psu) recorded from December 2015 to December 2016 in the South-West lagoon of Nouméa, New-Caledonia.

| months        | SST  | photoperiod | PAR    | Global radiation | rainfall | salinity |
|---------------|------|-------------|--------|------------------|----------|----------|
| December 2015 | 24.7 | 13.07       | 540.08 | 2652             | 0.71     | 36.08    |
| January       | 25.6 | 13.45       | 81.83  | 2533             | 1.48     | 36.08    |
| February      | 27.5 | 13.32       | 155.13 | 2659             | 2.03     | 35.95    |
| April         | 27.4 | 12.09       | 206.39 | 1708             | 8.07     | 35.46    |
| May           | 26.5 | 11.34       | 110.1  | 1825             | 1.21     | 35.55    |
| June          | 25.9 | 11.02       | 127.8  | 1468             | 6.3      | 35.66    |
| July          | 23.6 | 10.78       | 71.76  | 1080             | 4.11     | 35.85    |
| August        | 23.2 | 10.96       | 58.86  | 1331             | 0.82     | 36.09    |
| September     | 22.6 | 11.37       | 130.89 | 1518             | 3.05     | 36.13    |
| October       | 22.8 | 11.98       | 193.45 | 2174             | 0.17     | 36.08    |
| November      | 24.4 | 12.6        | 354.15 | 2385             | 0.86     | 35.72    |
| December      | 25.4 | 13.08       | 256.45 | 1954             | 5.8      | 35.31    |
